# Supplementary material
Source: PubMed Central journal article supplement (PMC9058387)
Supplement: sj-pdf-1-ult-10.1177_1742271X211034199.pdf [file sj-pdf-1-ult-10.1177_1742271X211034199.pdf]

**Appendix 1: Summary of key points and recommendations.**

| Theme                                              | Category                 | Key finding's impact on Physiotherapists' adoption of LUS                                                                                                                                                     | Recommendations                                                                                                                                                                                                                                                                                                                                                                                                                                                                                                                                                                                                                                                                                                                                                                                                                                                                                                                                                                                     |
|----------------------------------------------------|--------------------------|---------------------------------------------------------------------------------------------------------------------------------------------------------------------------------------------------------------|-----------------------------------------------------------------------------------------------------------------------------------------------------------------------------------------------------------------------------------------------------------------------------------------------------------------------------------------------------------------------------------------------------------------------------------------------------------------------------------------------------------------------------------------------------------------------------------------------------------------------------------------------------------------------------------------------------------------------------------------------------------------------------------------------------------------------------------------------------------------------------------------------------------------------------------------------------------------------------------------------------|
| <b>Support for physiotherapists using LUS</b>      | Organisation             | <p>The MDT generally supported physiotherapists' adoption of LUS.</p> <p>Pre-existing professional relationships were significant enablers.</p> <p>Communication regarding the remit of scanning was key.</p> | <p>Frameworks needs to be developed and published to guide how organisations and MDT members can support LUS for physiotherapists</p> <p>All stakeholders may seek advice from colleagues in other critical care units who have already adopted LUS into practice.</p> <p>Framework needs to be developed and published to guide how open communication can ensure all parties agree the remit of LUS adoption by physiotherapists in clinical environment.</p>                                                                                                                                                                                                                                                                                                                                                                                                                                                                                                                                     |
|                                                    | Physiotherapy department | <p>Some physiotherapy managers may be cautious regarding the professional considerations and potential legal implications.</p>                                                                                | <p>Physiotherapy managers and clinicians should seek advice from colleagues who have already adopted LUS into practice.</p> <p>Publication of guidance, e.g. frameworks to clarify professional considerations related to physiotherapists' adoption of LUS.</p>                                                                                                                                                                                                                                                                                                                                                                                                                                                                                                                                                                                                                                                                                                                                    |
| <b>Knowledge and understanding of LUS evidence</b> | Evidence base            | <p>The limited formal evidence base related to physiotherapists' use of LUS can be regarded as a barrier to its adoption.</p>                                                                                 | <p>Regularly review the expanding evidence base for relevance, transferability and applicability:</p> <ul style="list-style-type: none"> <li>• Research conducted by other professions in LUS</li> <li>• Publications related to ultrasound imaging by physiotherapists in other specialisms</li> <li>• Publications related to LUS by physiotherapists</li> </ul> <p>Proactive participation in opportunities to extend the evidence base:</p> <ul style="list-style-type: none"> <li>• Local audit/service evaluation/Quality Improvement</li> <li>• Participation in professional groups to develop policy</li> <li>• Formal clinical research, (collaborate with colleagues in Higher Education Institutions)</li> </ul> <p>Proactive sharing of evidence:</p> <ul style="list-style-type: none"> <li>• Publish and present at conferences, (collaborate for support)</li> <li>• Contribute to professional networks</li> <li>• Establish peer support groups for knowledge exchange</li> </ul> |

|                                                |                                   |                                                                                                                                                                                                                                                                                   |                                                                                                                                                                                                                                                                                                                                                                                                                                                                                                                   |
|------------------------------------------------|-----------------------------------|-----------------------------------------------------------------------------------------------------------------------------------------------------------------------------------------------------------------------------------------------------------------------------------|-------------------------------------------------------------------------------------------------------------------------------------------------------------------------------------------------------------------------------------------------------------------------------------------------------------------------------------------------------------------------------------------------------------------------------------------------------------------------------------------------------------------|
|                                                | Department understanding of LUS   | Adopting a new technique, approach, technology or intervention necessitates addressing a sharp learning curve. Development is not possible without learning and strategies to evaluate value.                                                                                     | <p>Clinicians may draw on support from professional and regulatory bodies.</p> <p>Clinicians may need to recruit support strategies to facilitate the process of linking theory to new practice:</p> <ul style="list-style-type: none"> <li>• Establish peer support groups for knowledge exchange</li> <li>• Set up collaborations, e.g. with Higher Education Institutions to support audit, clinical research and sharing of findings.</li> </ul> <p>Quality Improvement (QI) theory may provide guidance.</p> |
| <b>Governance</b>                              | Clinical effectiveness            | <p>High sensitivity and specificity of LUS when compared to other imaging.</p> <p>No ionising radiation so can be used for serial scanning.</p> <p>Integrated into practice to facilitate clinical decision making</p> <p>Tool to quickly evaluate efficacy of interventions.</p> | <p>Clinicians to draw on:</p> <ul style="list-style-type: none"> <li>• Formal clinical data and personal observations</li> <li>• Evidence relating to physiotherapists' adoption of LUS and transferable evidence</li> </ul> <p>Publication of guidance, e.g. relevant frameworks and publications from professional and regulatory bodies.</p>                                                                                                                                                                   |
|                                                | Education                         | Existing education pathways are effective but support and mentorship can be difficult to access                                                                                                                                                                                   | <p>Evaluation of existing education pathways.</p> <p>Liaison between education providers and professional bodies for coherency and strategies to enhance mentorship opportunities.</p>                                                                                                                                                                                                                                                                                                                            |
|                                                | Risk management                   | <p>Clinical risk, (direct harm) from LUS is very low.</p> <p>Managers are wary of indirect harm – imaging and communication errors.</p>                                                                                                                                           | Publication of guidance, e.g. relevant frameworks and publications from professional and regulatory bodies.                                                                                                                                                                                                                                                                                                                                                                                                       |
| <b>Physiotherapists' motivation to use LUS</b> | Personal motivation               | <p>Professional career development.</p> <p>Enhancement to professional satisfaction and stimulation.</p>                                                                                                                                                                          | Individual clinicians may need to create as well as respond to professional development opportunities.                                                                                                                                                                                                                                                                                                                                                                                                            |
|                                                | Physiotherapy specific motivation | LUS aligns with respiratory physiotherapist's assessment and management processes.                                                                                                                                                                                                | <p>Clinical research required to evaluate efficacy of LUS with critical care patient population.</p> <p>Publication of guidance, e.g. relevant frameworks and publications from professional and regulatory bodies.</p>                                                                                                                                                                                                                                                                                           |

|                  |                                        |                                                                                                   |                                                                                                                                                   |
|------------------|----------------------------------------|---------------------------------------------------------------------------------------------------|---------------------------------------------------------------------------------------------------------------------------------------------------|
|                  | Patient related motivation             | LUS may contribute to patient education, management adherence and clinical outcomes.              | Qualitative research required to evaluate the impact of LUS on the patient experience.                                                            |
| <b>Resources</b> | Accessing mentorship and time to train | Competing demands on time present a challenge to accessing LUS education and mentorship.          | Research that evaluates and demonstrates the efficacy of LUS implementation by physiotherapists is key to rationalisation of training priorities. |
|                  | Time: efficient use                    | LUS regarded as time effective resource                                                           | Clinical data exploring impact on work efficiency required.                                                                                       |
|                  | Equipment                              | Some physiotherapists were competing with other MDT members for equipment on critical care units. | Research that evaluates and demonstrates the efficacy of LUS implementation by physiotherapists is key to equipment procurement.                  |
